# Supplementary material for: Present situation and prospect of irradiation dose measurement.
Source: MDPI journal article supplement (doi:10.3390/microorganisms9071398), 1971-01-01
Supplement: s1 [file s1]

## Supplementary Materials

**Table S1.** Characteristics of *Francisella* sp. positive water samples.

| Site of water sampling | Type of water sample | First campaign |            |                          |                        |                          |            | Second campaign |            |                          |                        |                          |            |
|------------------------|----------------------|----------------|------------|--------------------------|------------------------|--------------------------|------------|-----------------|------------|--------------------------|------------------------|--------------------------|------------|
|                        |                      | T °C           | NaCl (g/L) | ISFtu2-qPCR (average Ct) | Tul4-qPCR (average Ct) | Type B-qPCR (average Ct) | Acant-qPCR | T °C            | NaCl (g/L) | ISFtu2-qPCR (average Ct) | Tul4-qPCR (average Ct) | Type B-qPCR (average Ct) | Acant-qPCR |
| <b>J1P1</b>            | Ocean                | 21.0           | 37         | + (31.1)                 | + (36.5)               | + (35.8)                 | +          | 11.0            | 31         |                          |                        |                          | +          |
| <b>J1P2</b>            | Canal near ocean     | 25.6           | 16         | + (32.7)                 | + (36.4)               | + (36.9)                 |            | 11.6            | 2          |                          |                        |                          | +          |
| <b>J1P3</b>            | Canal near ocean     | 27.2           | 38         | + (35.6)                 |                        |                          |            | 13.2            | 3          |                          |                        |                          | +          |
| <b>J1P4</b>            | River near ocean     | 23.8           | 37         | + (32.1)                 | + (36.8)               |                          | NP         | 7.0             | 6          | + (35.4)                 | + (37.3)               |                          | +          |
| <b>J1P5</b>            | Pond near ocean      | 27.8           | 46         |                          |                        |                          |            | 13.6            | 12         | + (33.2)                 | + (34.4)               |                          | +          |
| <b>J1P6</b>            | Pond                 | 27.1           | 2          |                          |                        |                          |            | 12.6            | 2          | + (34.9)                 | + (37.6)               |                          | +          |
| <b>J1P7</b>            | Pond                 | 29.9           | 1          |                          |                        |                          |            | 12.2            | 3          | + (31.8)                 | + (35.9)               |                          | +          |
| <b>J1P9</b>            | Pond                 | 27.8           | 2          | + (36.0)                 | + (37.6)               |                          |            | 12.4            | 2          | + (33.3)                 | + (36.6)               |                          | +          |
| <b>J1P11</b>           | Pond                 | 28.8           | 1          |                          |                        |                          |            | 9.2             | 2          | + (33.5)                 | + (37.1)               |                          |            |
| <b>J1P12A</b>          | Pond                 | 18.6           | 2          |                          |                        |                          |            | 12.9            | 2          | + (32.5)                 | + (35.7)               | + (38.2)                 | +          |
| <b>J1P13</b>           | River                | 18.7           | 2          | + (35.4)                 |                        |                          |            | 12.7            | 2          | + (33.5)                 | + (38.1)               |                          | +          |
| <b>J2P1</b>            | River                | 18.8           | NP         | + (36.0)                 |                        |                          | +          | NS              | NS         | NS                       | NS                     | NS                       | NS         |
| <b>J2P16SB</b>         | River                | 18.2           | NP         | + (35.0)                 |                        |                          | +          | NS              | NS         | NS                       | NS                     | NS                       | NS         |
| <b>J2P22</b>           | Pond                 | 25.9           | NP         |                          |                        |                          |            | 11.8            | 1          | + (33.3)                 | + (36.5)               |                          | +          |
| <b>J2P23A</b>          | Pond                 | 21             | 2          |                          |                        |                          | +          | 13.3            | 2          | + (33.5)                 | + (36.4)               |                          | +          |
| <b>J2P23B</b>          | River                | 23.7           | NP         |                          |                        |                          | +          | 13.0            | 1          | + (30.9)                 | + (34.7)               | + (39.4)                 | +          |
| <b>J2P24</b>           | Pond                 | 22.3           | 2          | + (35.6)                 | + (38.4)               |                          |            | 13.1            | 2          | + (33.9)                 | + (37.2)               | + (38.8)                 | +          |
| <b>J2P42</b>           | Pond                 | 23.7           | 3          |                          |                        |                          | +          | 9.0             | 2          | + (34.1)                 |                        |                          | +          |
| <b>J2P43</b>           | Lake                 | 24.4           | 2          | + (36.0)                 | + (38.4)               |                          | +          | 12.3            | 1          | + (33.3)                 | + (36.4)               |                          | +          |
| <b>J2P52A</b>          | Pond                 | 24.7           | 1          |                          |                        |                          | +          | 12.0            | 2          | + (33.5)                 | + (36.4)               |                          | +          |
| <b>J2P53SA</b>         | Pond                 | 23.2           | 2          |                          |                        |                          |            | 10.6            | 2          | + (35.1)                 | + (37.7)               |                          | +          |

|                |               |      |    |          |          |          |   |      |    |          |          |          |    |
|----------------|---------------|------|----|----------|----------|----------|---|------|----|----------|----------|----------|----|
| <b>J2P54A</b>  | Pond          | 24.4 | 1  |          |          |          | + | 11.6 | 1  | + (32.4) | + (35.9) |          | +  |
| <b>J2P55SA</b> | Pond          | 20.0 | NP | + (35.7) |          |          | + | NS   | NS | NS       | NS       | NS       | NS |
| <b>J3P1</b>    | Dam on river* | 20.3 | 2  | + (32.8) | + (37.0) |          |   | 11.3 | 2  | + (32.7) | + (37.4) |          | +  |
| <b>J3P6SA</b>  | River*        | 25.6 | 1  | + (34.5) |          |          |   | 12.3 | 2  | + (33.6) | + (37.8) |          | +  |
| <b>J3P6SB</b>  | River*        | 21.6 | 2  |          |          |          | + | 12.3 | 2  | + (34.5) | + (37.2) |          | +  |
| <b>J3P7</b>    | River£        | 21.6 | 1  |          |          |          | + | 10.6 | 1  | + (35.1) | + (37.3) |          | +  |
| <b>J3P8</b>    | Dam£          | 25.6 | 1  | + (32.0) | + (35.5) | + (37.4) | + | 13.0 | 2  | + (35.1) | + (38.4) |          | +  |
| <b>J3P8SA</b>  | River£        | 20.1 | 1  |          |          |          |   | 11.6 | 2  | + (34.6) | + (37.1) |          | +  |
| <b>J3P9</b>    | River£        | 23.3 | 2  |          |          |          | + | 12.3 | 2  | + (34.5) | + (36.5) |          | +  |
| <b>J3P9SA</b>  | River         | 19.7 | 2  | + (31.9) | + (37.5) | + (36.5) | + | 13.0 | 2  | + (32.9) | + (34.9) | + (37.6) | +  |

For ISFtu2-qPCR : + = positive in duplicate with Ct ≤ 36 ; For Tul4-qPCR, Type B-qPCR and Acanth-qPCR : + = positive in duplicate ; NP = not performed ; NP = not performed ; NS = not sampled in the second campaign ; \* and £: samples from the same river .

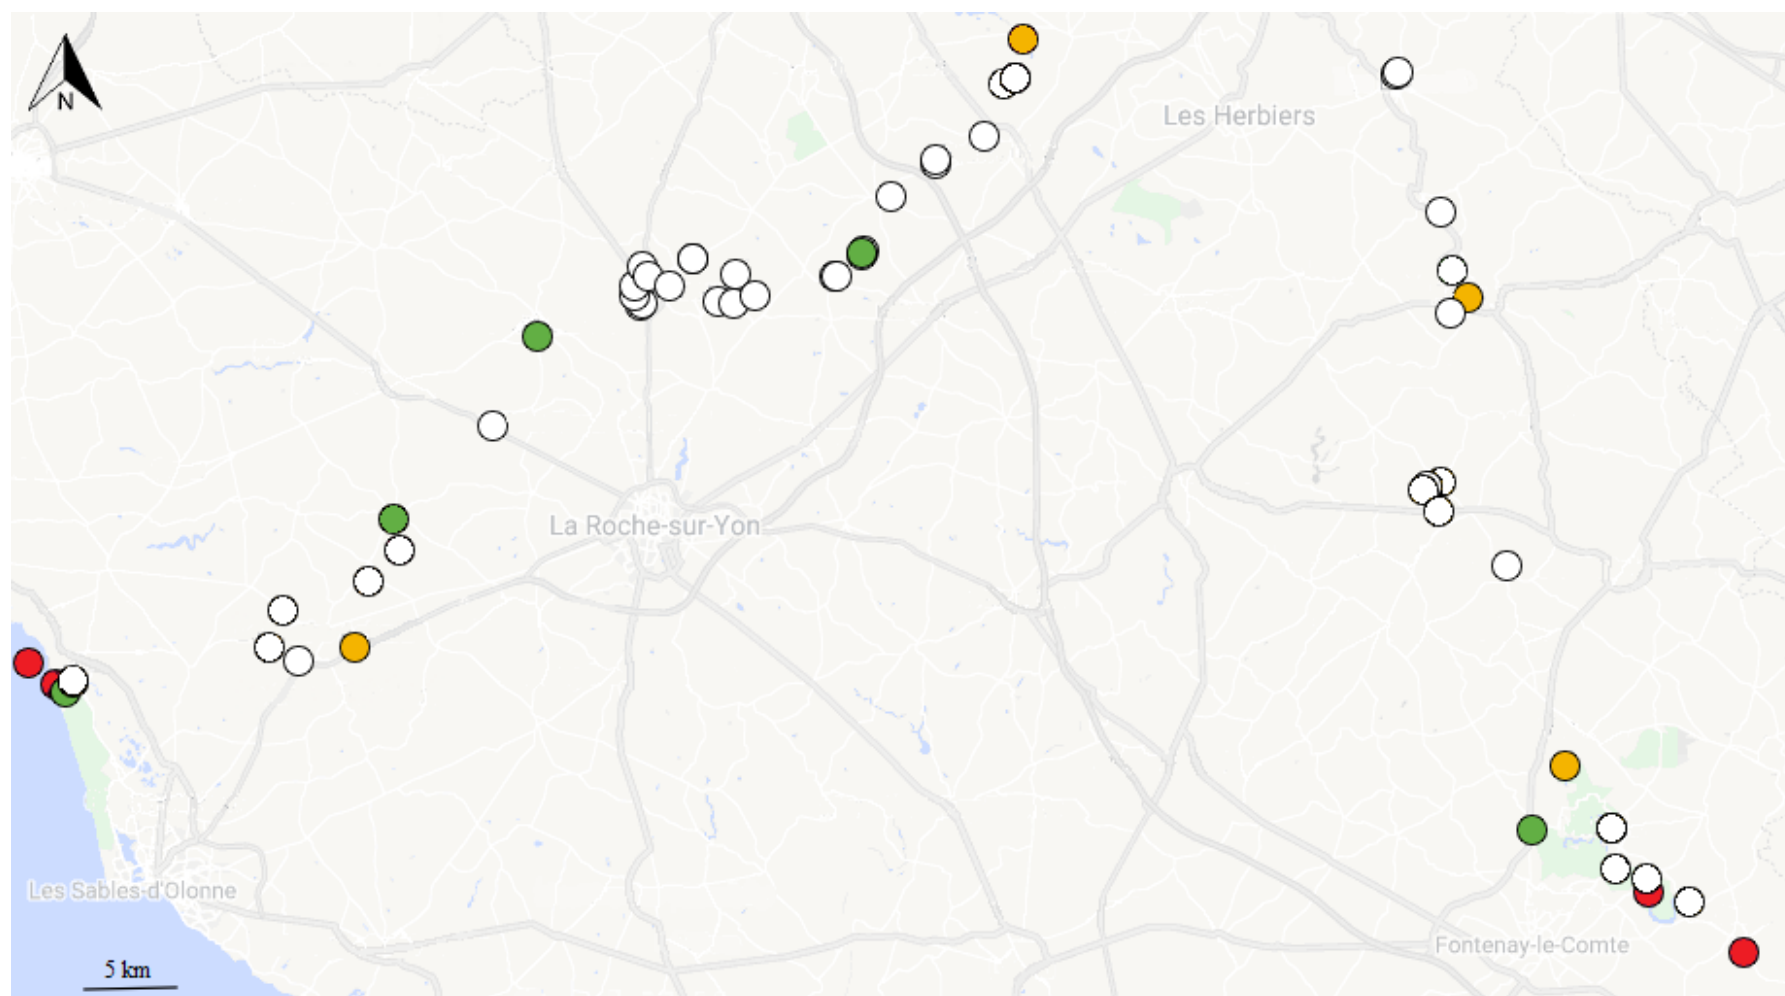

**Figure S1.** *Francisella* sp. detection in surface water samples collected during July 2019. For each site DNA were extracted from water and three q-PCR were performed (ISFtu2-qPCR for *Francisella* sp., Tul4-qPCR for *F. tularensis*, and Type B-qPCR for *F. tularensis* subsp. *holarctica*). White disk: sample with no positive qPCR. Green disk: sample positive for ISFtu2-qPCR and negative for Tul4 and Type B-qPCR. Orange disk: sample positive for ISFtu2 and Tul4-qPCR and negative for Type B-qPCR. Red disk: sample positive for the three qPCR tests.

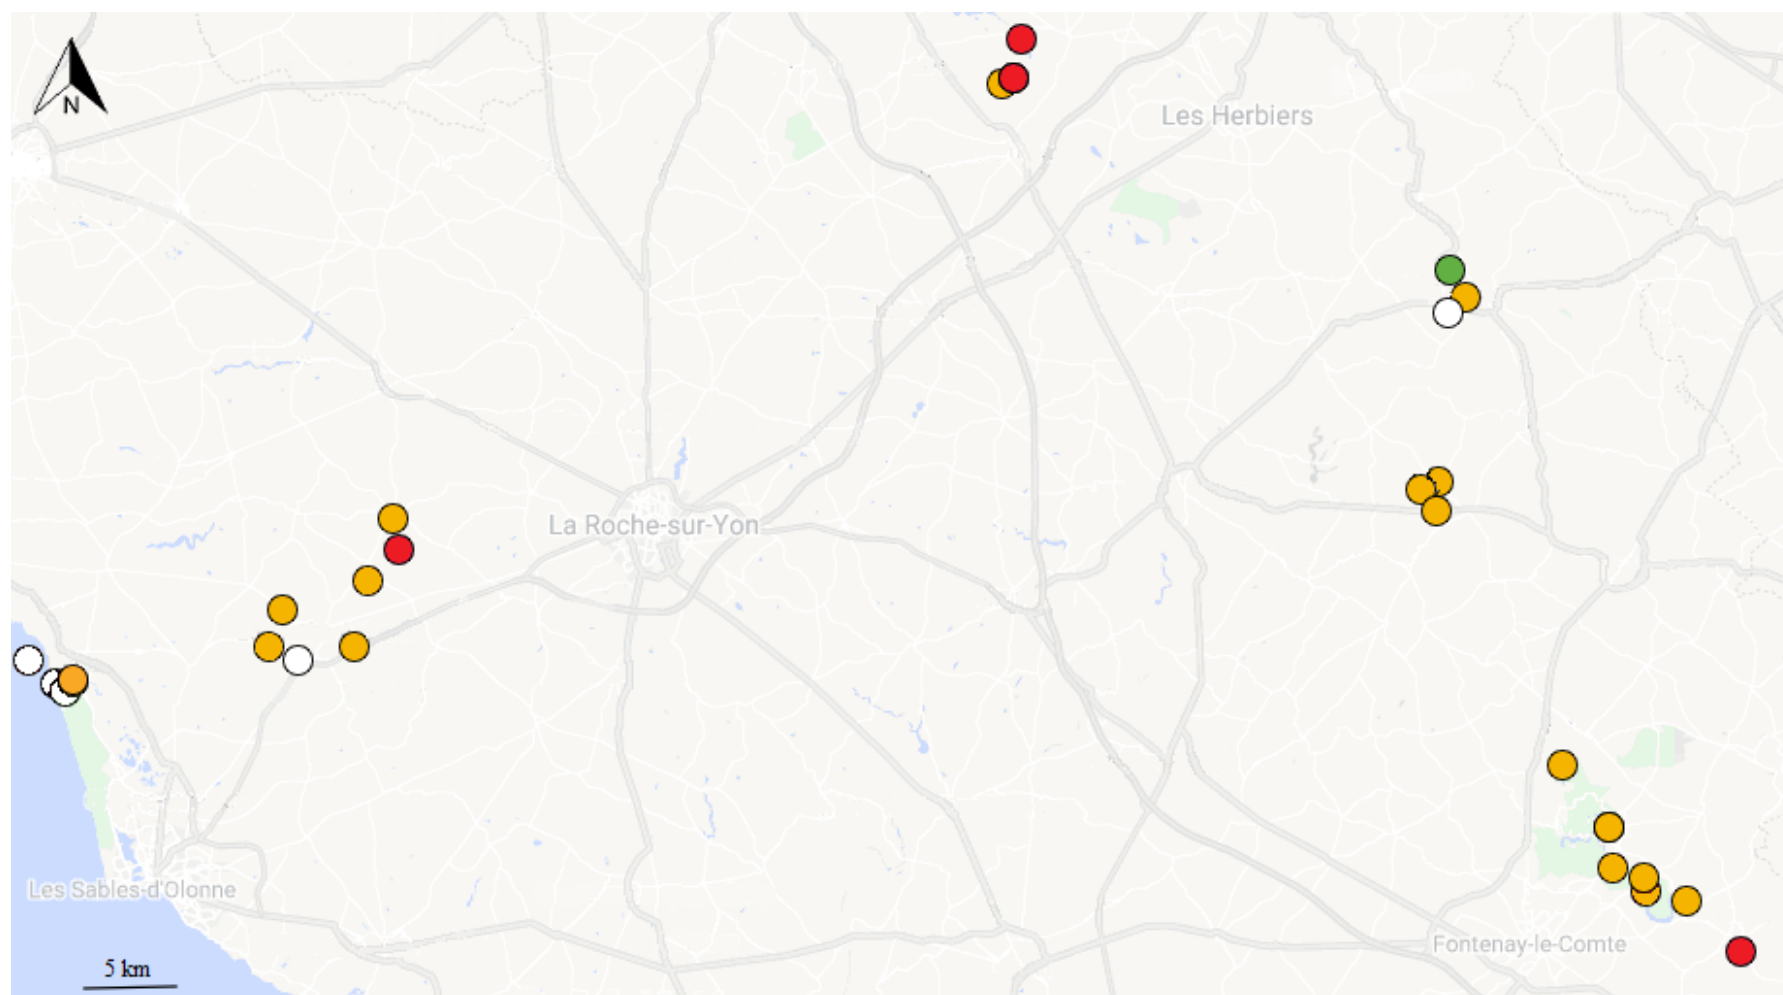

**Figure S2.** Francisella sp. detection in surface water samples collected during January 2020. For each site DNA were extracted from water and three q-PCR were performed (ISFtu2-qPCR for *Francisella* sp., Tul4-qPCR for *F. tularensis*, and Type B-qPCR for *F. tularensis* subsp. *holarctica*). White disk: sample with no positive qPCR. Green disk: sample positive for ISFtu2-qPCR and negative for Tul4 and Type B-qPCR. Orange disk: sample positive for ISFtu2 and Tul4-qPCR and negative for Type B-qPCR. Red disk: sample positive for the three qPCR tests.
